# Supplementary material for: Highly effective and fast removal of bisphenol A from environmental samples using an eco-friendly surface molecularly imprinted polymer based on MIL-100(Fe)
Source: Royal Society of Chemistry journal article supplement (doi:10.1039/d4nj01848f), 2024-01-01
Supplement: d4nj01848f1.pdf [file d4nj01848f1.pdf]

1 **Highly effective and fast removal of bisphenol A from environmental**  
2 **samples by an eco-friendly surface molecularly imprinted polymer**  
3 **based on MIL-100(Fe)**

4

5 Yongli Liu, Wanwan Li, Lin Liu, Runan Chen, Li Wang, Bin Li, Ruijuan Duan, Guifen Zhu\*

6

7 School of Environment, Key Laboratory of Yellow River and Huai River Water

8 Environment and Pollution Control, Ministry of Education, Henan Key Laboratory for

9 Environment Pollution Control, Henan Province's International Joint Laboratory on Key

10 Techniques in Water Treatment, Henan Normal University, Xinxiang, Henan 453007, P. R.

11 China.

12

13

14 **1. Materials and reagents**

15 Iron powder, 1,3,5-benzenetricarboxylic acid, 2-hydroxyethyl methacrylate, N,N'-

16 methylenebis(acrylamide), bisphenol B and sulfathiazole were purchased from J&K Scientific

17 Ltd (Beijing, China). 1-Allyl-3-vinylimidazolium bromide was brought from Cheng Jie

18 Chemical Co. Ltd (Shanghai, China). Bisphenol A, 2-hydroxynaphthalene and 2,4-

19 dinitrophenol were acquired from Guangfu Fine Chemical Research Institute (Tianjin, China).

20 2,2'-Azobis(2-methylpropionitrile) was provided by Beijing Chemical Reagents Co., Ltd

---

\* Corresponding author: Tel.: +86 373 3325971; fax: +86 373 3326336.

E-mail address: gzfzhu617@163.com

21 (Beijing, China). Methanol, anhydrous ethanol, hydrofluoric acid, nitric acid and acetic acid  
22 were obtained from De'en Chemical Reagents Co., Ltd (Tianjin, China). HPLC grade  
23 acetonitrile and pure water were separately supplied from Tedia Co. Ltd (Fairfield, USA) and  
24 Wahaha Co. Ltd (Henan, China).

25

## 26 **2. Instruments**

27 The morphology and size were measured by a Supra 40 field scanning electron microscopy  
28 (SEM) (Carl Zeiss, Germany). X-ray diffraction patterns (XRD) were obtained from a D-8  
29 Discovery diffractometer (Bruker, Germany). Fourier transform infrared spectroscopy (FT-IR)  
30 measurements were performed on a Model Perkin-Elmer 983 spectrometer (Perkin Elmer,  
31 USA). X-ray photoelectron spectra (XPS) were carried out on an ESCALAB 250Xi  
32 spectrometer (Thermo Fisher, USA). The specific surface area parameters were achieved by a  
33 Model ASAP 2020 automatic surface area and porosity analyzer (Micromeritics, USA). The  
34 thermal stability was determined by a STA449C thermogravimetric analyzer (Netzsch,  
35 Germany). Absorption measurements were obtained from a Model T6 UV-vis  
36 spectrophotometer (Pgeneral, China). HPLC evaluation was measured with an Alliance 2489  
37 high-performance liquid chromatography system (Waters, USA).

38

## 39 **3. HPLC analysis**

40 The concentration of the BPA before and after adsorption by the MIL-100(Fe)@MIP was  
41 detected by HPLC with an ultraviolet detector at 278 nm (Alliance 2695-2489). The

42 chromatography system was equipped with a C<sub>18</sub> column (4.6 mm×150 mm, 5 μm) and the  
43 mobile phase was a 70:30 (V/V) mixture of acetonitrile and water containing 0.1% acetic acid  
44 (V/V). A volume of 20 μL was injected into the HPLC system with a flow rate of 1.0 mL min<sup>-1</sup>  
45 at 30 °C for analysis.

46

#### 47 4. Characterization

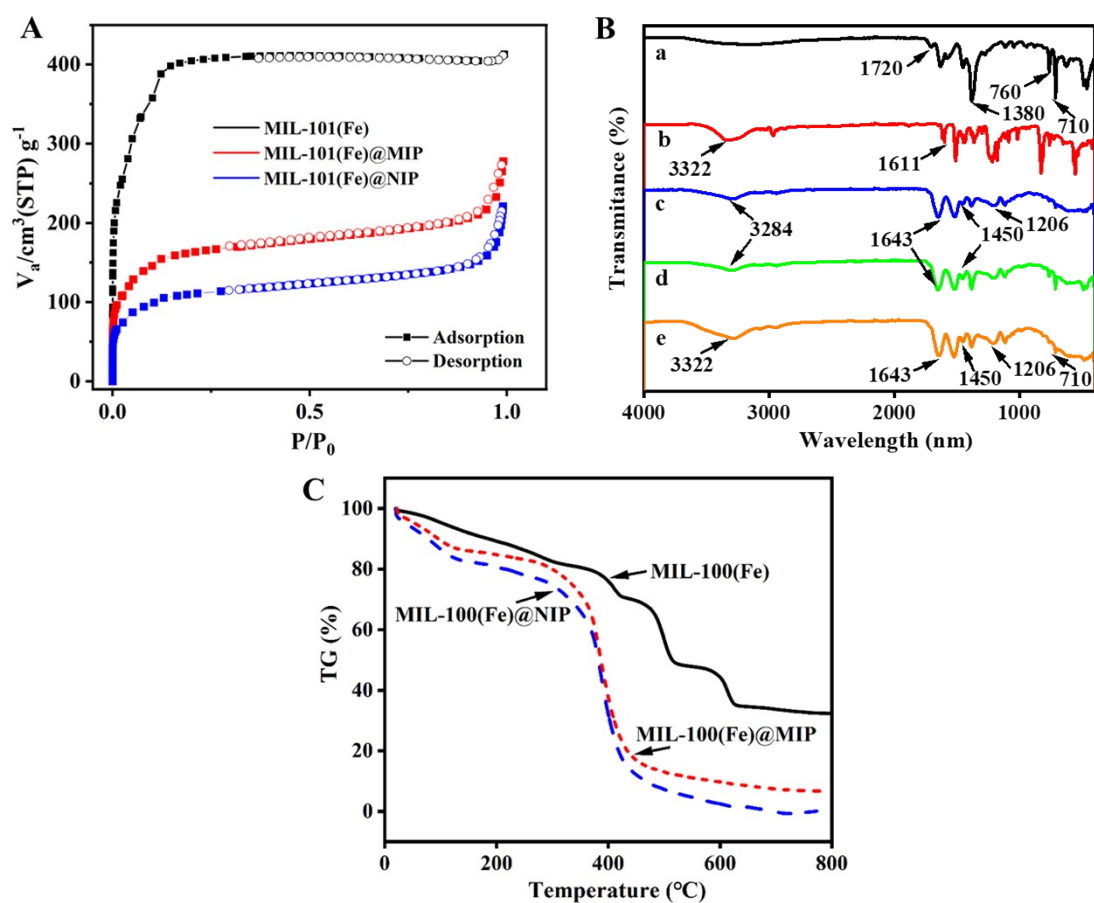

48

49 **Fig. S1** (A) Nitrogen adsorption–desorption isotherms of MIL-100(Fe), MIL-100(Fe)@MIP,  
50 and MIL-100(Fe)@NIP. (B) Fourier-transform infrared spectra of MIL-100(Fe) (a),  
51 BPA (b), MIL-100(Fe)@MIP (c), MIL-100(Fe)@NIP (d), and MIL-100(Fe)@MIP  
52 after adsorption of BPA (e). (C) TGA of MIL-100(Fe), MIL-100(Fe)@MIP, and MIL-  
53 100(Fe)@NIP. BPA: bisphenol A.

54 **5. The adsorption kinetic properties of MIL-100(Fe)@MIP and MIL-100(Fe)@NIP**

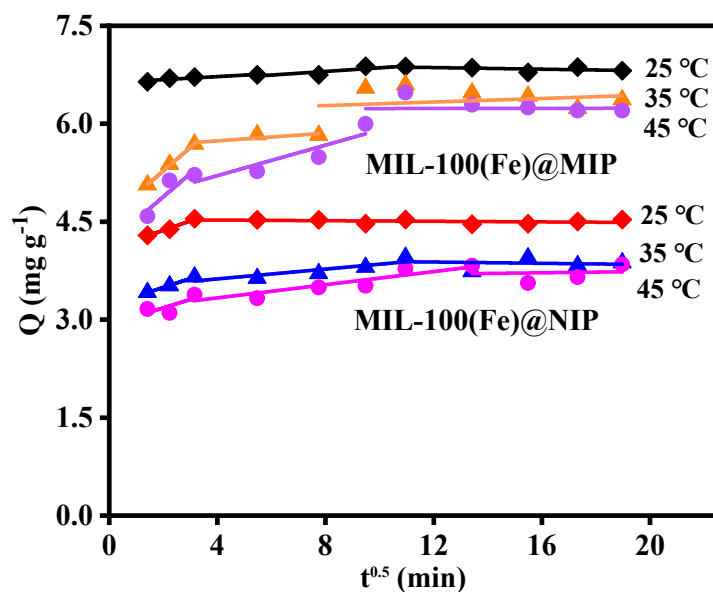

55

56 **Fig. S2** Intra-particle diffusion model fitting curves of the MIL-100(Fe)@MIP and MIL-

57 100(Fe)@NIP toward BPA at 25 °C, 35 °C and 45 °C, respectively.

58

59 **6. Selectivity**

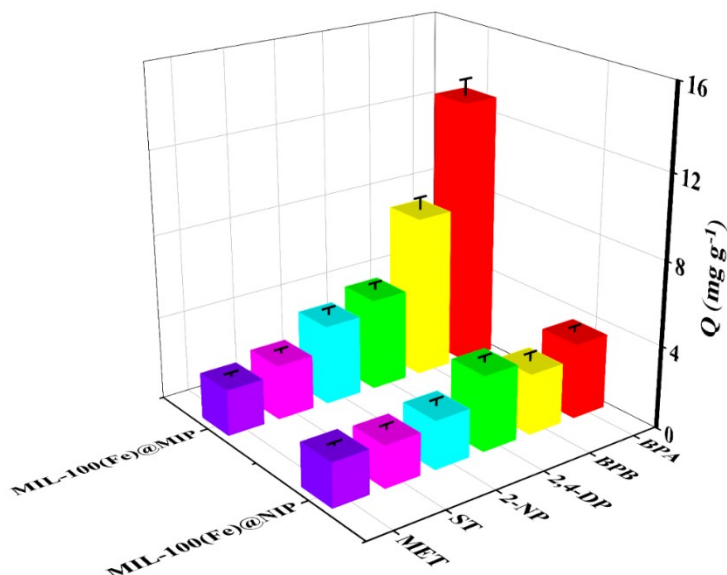

60

61 **Fig. S3** Selectivity of MIL-100(Fe)@MIP and MIL-100(Fe)@NIP towards BPA and

62 interferents

### 63 7. Synthesis process of MIL-100(Fe)@MIP

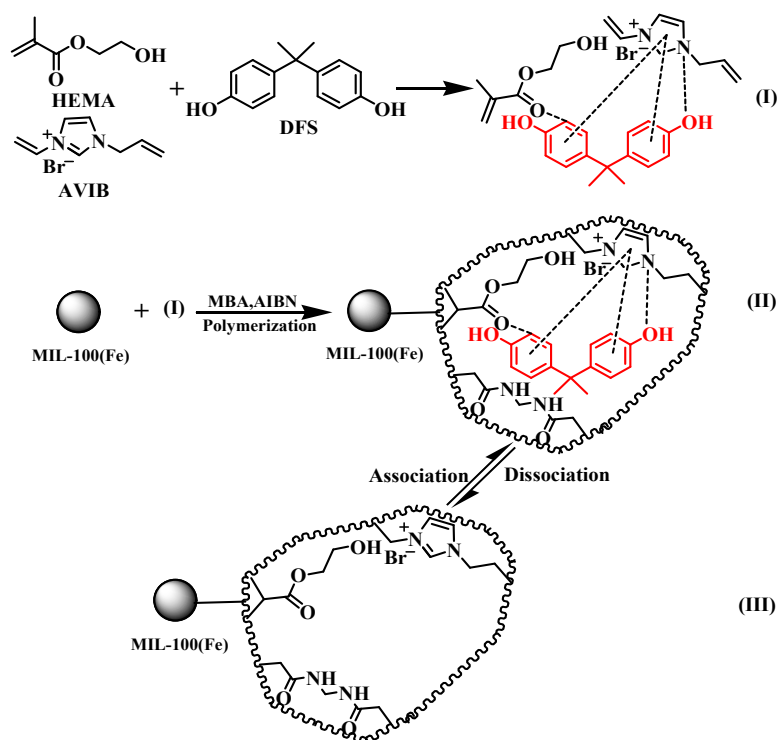

64

65 **Fig. S4** Schematic diagram of synthesis process of MIL-100(Fe)@MIP

66

### 67 8. Solid phase extraction and optimization of SPE

68 A solid phase extraction (SPE) column was firstly prepared by packing 65 mg of the MIL-  
69 100(Fe)@MIP into an empty 3 mL polypropylene column (Waters, USA), and the SPE  
70 column was firstly activated by chromatographic methanol and pure water. Afterwards, 0.1  
71 mg L<sup>-1</sup> of BPA aqueous solution was passed through the cartridge under the certain condition  
72 followed by washed with designed different eluents. The concentration of BPA in eluant was  
73 determined using HPLC.

74 To obtain excellent extraction performance, some important parameters such as sample  
75 flow rate, sample volume, eluent type were further optimized. To estimate the influence of the

76 flow rate on extraction efficiency, the flow rate was varied from to 0.4 mL min<sup>-1</sup> to 1.2 mL  
77 min<sup>-1</sup>. As shown in Fig. S4A, when the flow rate was lower than 0.7 mL min<sup>-1</sup>, the recoveries  
78 of BPA were kept at 100%, and those decreased as the flow rate continued to increase. Thus,  
79 0.6 mL min<sup>-1</sup> was used as the best flow rate for loading the sample onto the SPE column. The  
80 effect of sample volume was investigated in the range of 0-14 mL, and the results were  
81 displayed in Fig. S4B. When the sample volume was lower than 11 mL, the recoveries of  
82 BPA were kept at 100%, and then decreased as sample volume further increased. Elution of  
83 BPA was a key step in the SPE procedure. The complete elution of BPA was depended on the  
84 appropriate elution solvent. Six kinds of mixed solutions were selected as eluents which  
85 contained acetonitrile, methanol, methanol/water (70/30, V/V), methanol/water (80/20, V/V),  
86 methanol/water/acid (80/19/1, V/V/V) and methanol/water/acid (80/18/2, V/V/V), and the  
87 recoveries were demonstrated in Fig. S4C. When methanol/water/glacial acetic acid (80/18/2,  
88 V/V/V) was served as eluent, the recovery reached to 100%. However, the recoveries of BPA  
89 were all less than 100% while the other five mixed solutions were used as eluent. Therefore,  
90 methanol/water/glacial acetic acid (80/18/2, V/V/V) was finally selected as the eluent.

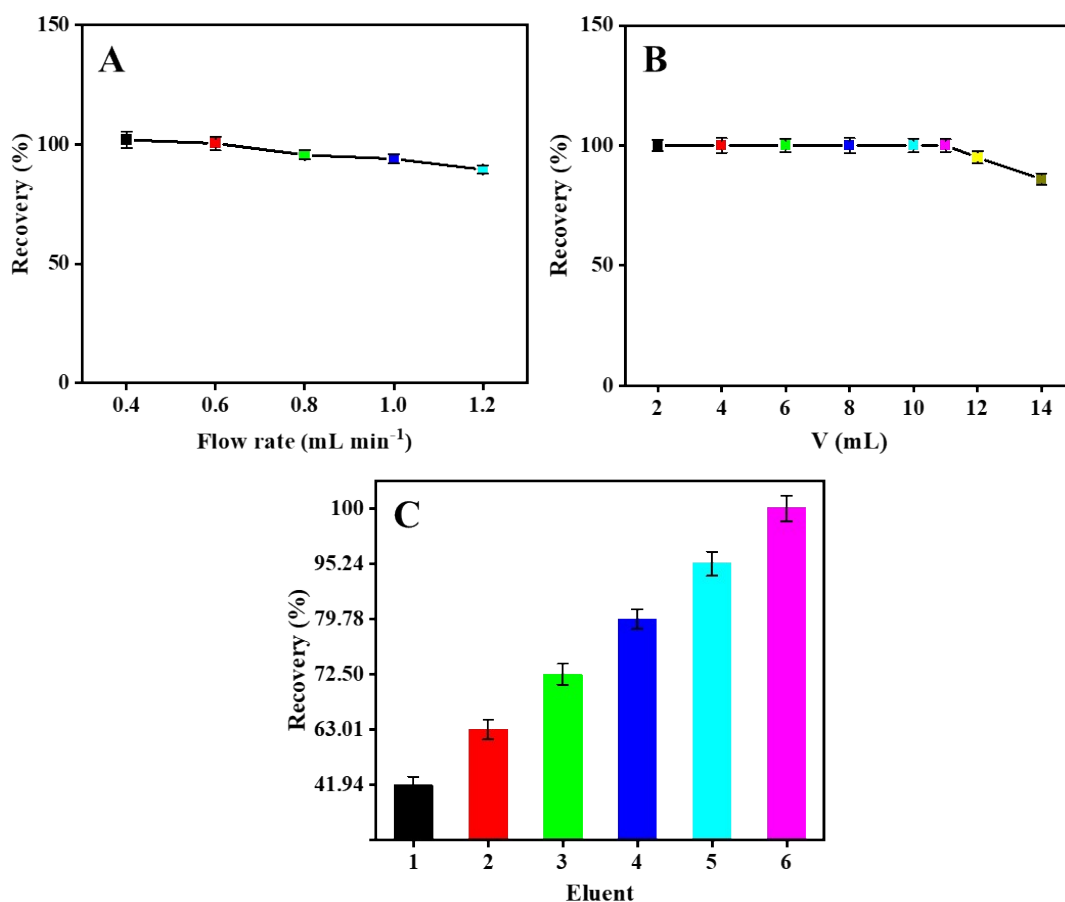

91

92 **Fig. S5** (A) Optimization of flow rate (B) Optimization of sample volume (C) Optimization of

93 eluent: 1 stands for acetonitrile; 2 stands for acetonitrile methanol; 3 stands for

94 methanol:water =70:30, V/V; 4 stands for methanol:water =80:20, V/V; 5 stands for

95 methanol:water:acid =80:19:1, V/V/V; 6 stands for methanol: water: acid =80:18:2,

96 V/V/V

97

## 98 9. Establishment of analytical method

99 The linearity range, correlation coefficient, limits of detection, and repeatability were

100 investigated under optimum experimental conditions. A good linearity with the correlation

101 coefficient of 0.9994 was found in the BPA concentration range of 0.001–0.4 mg L<sup>-1</sup> with the

102 linear equation  $y=31684x+173.29$ . The limit of detection was are  $0.5 \mu\text{g L}^{-1}$ , which was  
103 calculated based on signal-to-noise ratio equal to 3. Additionally, the BPA concentration of  
104  $0.1 \text{ mg L}^{-1}$  was selected to investigate precision analysis. The RSDs of intra-day and inter-day  
105 precision were 1.45% and 2.53%, respectively ( $n=3$ ).

106

## 107 10. Chromatograms of real samples analysis

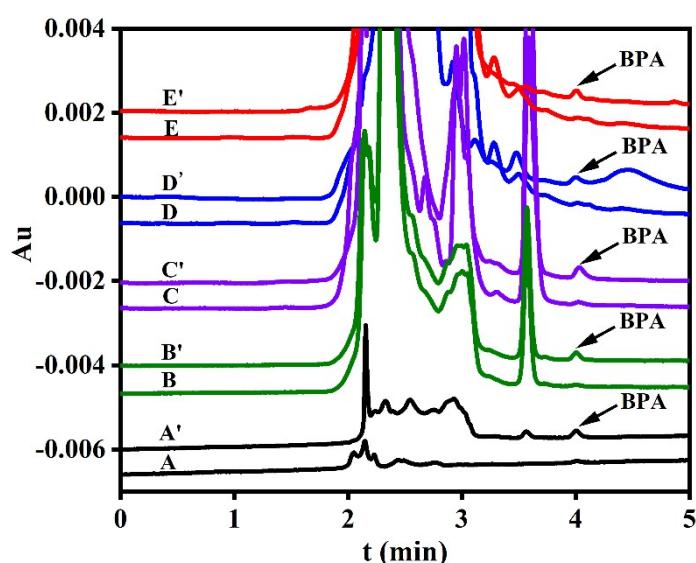

108

109 **Fig. S6** Chromatograms of real E samples without and with spiked  $20 \mu\text{g L}^{-1}$  of BPA after MIL-  
110 100(Fe)@MIP-SPE extraction. Plots A, B, C, D, and E show the elution of the  
111 original treatment sewage from disposable lunch box, canned yellow peach, orange  
112 juice, soybean milk and teabag samples without extraction. Plots A', B', C' D', and E'  
113 represent the spiked  $20 \mu\text{g L}^{-1}$  of BPA elution from the same sources. BPA: bisphenol

114 A

115

## 116 11. Regeneration

117 The regeneration of adsorbents is one of the most important criteria for the purpose of cost



118 and efficiency. In order to investigate the regeneration of MIL-100(Fe)@MIP, the adsorption-  
119 desorption procedure was repeated. Briefly, 0.1 mg L<sup>-1</sup> of BPA was passed through the MIL-  
120 100(Fe)@MIP-SPE column under the optimized condition followed by washing with the  
121 mixed solution of methanol/water/acetic acid (80/18/2, V/V/V). The concentration of BPA in  
122 eluent was measured using HPLC at 278 nm, and the result was shown in Fig. S6. It can be  
123 clearly seen that approximately 90.10% of BPA can be obtained by this MIL-100(Fe)@MIP-  
124 SPE cartridge after 20 cycles, indicating that MIL-100(Fe)@MIP exhibit excellent  
125 regeneration and good stability.

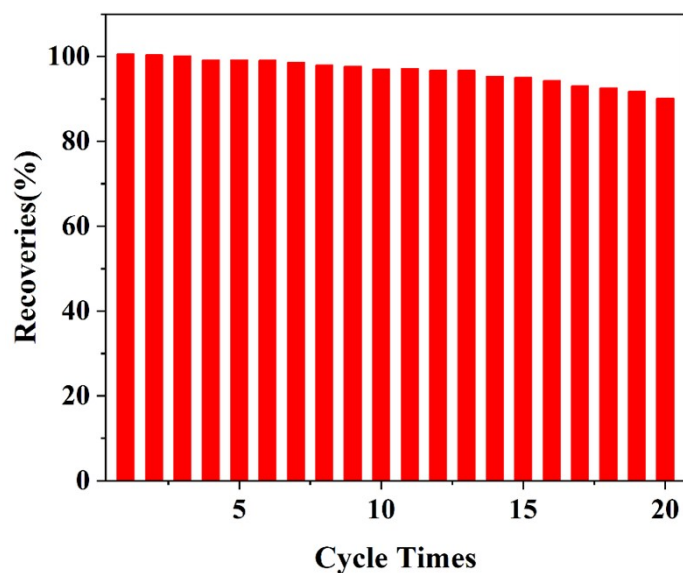

126

127

**Fig. S7** The regeneration performance of MIL-100(Fe)@MIP-SPE after 20 cycles

128 **Table S1** Partial BET parameters of MIL-100(Fe), MIL-100(Fe)@MIP, and MIL-100(Fe)@NIP

| Material        | Specific surface area (m <sup>2</sup> g <sup>-1</sup> ) | Total pore volume (cm <sup>3</sup> g <sup>-1</sup> ) | Mean pore diameter (nm) |
|-----------------|---------------------------------------------------------|------------------------------------------------------|-------------------------|
| MIL-100(Fe)     | 2049.00                                                 | 0.8930                                               | 1.74                    |
| MIL-100(Fe)@MIP | 589.74                                                  | 0.4229                                               | 2.87                    |
| MIL-100(Fe)@NIP | 394.83                                                  | 0.3403                                               | 3.45                    |

130 **Table S2** Parameters of adsorption kinetic models for the MIL-100(Fe)@MIP and MIL-100(Fe)@NIP at various temperatures.

| T (°C) |                 | Intra-particle diffusion                           |        |         |                                                    |        |         |                                                    |        |         |
|--------|-----------------|----------------------------------------------------|--------|---------|----------------------------------------------------|--------|---------|----------------------------------------------------|--------|---------|
|        |                 | $K_{d1}$ (mg g <sup>-1</sup> min <sup>-0.5</sup> ) | $I_1$  | $R_1^2$ | $K_{d2}$ (mg g <sup>-1</sup> min <sup>-0.5</sup> ) | $I_2$  | $R_2^2$ | $K_{d3}$ (mg g <sup>-1</sup> min <sup>-0.5</sup> ) | $I_3$  | $R_3^2$ |
| 25     | MIL-100(Fe)@MIP | 0.0231                                             | 6.6296 | 0.8081  | 0.0277                                             | 6.5794 | 0.6551  | -0.0060                                            | 6.9356 | 0.0151  |
|        | MIL-100(Fe)@NIP | 0.1453                                             | 4.0773 | 0.9699  | -0.0023                                            | 4.5340 | 0.0135  | -                                                  | -      | -       |
| 35     | MIL-100(Fe)@MIP | 0.3582                                             | 4.5620 | 0.9974  | 0.0293                                             | 5.6212 | 0.4012  | 0.0136                                             | 6.1703 | 0.0467  |
|        | MIL-100(Fe)@NIP | 0.1356                                             | 3.2229 | 0.9940  | 0.0376                                             | 3.4741 | 0.7035  | -0.0048                                            | 3.9406 | 0.0271  |
| 45     | MIL-100(Fe)@MIP | 0.3564                                             | 4.1689 | 0.6464  | 0.1169                                             | 4.7381 | 0.7249  | 0.0005                                             | 6.2273 | 0.0002  |
|        | MIL-100(Fe)@NIP | 0.1285                                             | 2.9241 | 0.1668  | 0.0503                                             | 3.1326 | 0.8034  | 0.0557                                             | 3.6382 | 0.0076  |

132 **Table S3**

133 Thermodynamic parameters of BPA adsorbed by the MIL-100(Fe)@MIP and MIL-100(Fe)@NIP

|                 | T(K)   | $K_L$ (L mol <sup>-1</sup> ) | $\Delta G^0$ (kJ mol <sup>-1</sup> ) | $\Delta H^0$ (kJ mol <sup>-1</sup> ) | $\Delta S^0$ (kJ mol <sup>-1</sup> K <sup>-1</sup> ) |
|-----------------|--------|------------------------------|--------------------------------------|--------------------------------------|------------------------------------------------------|
|                 | 298.15 | 49013.86                     | -26.7709                             |                                      |                                                      |
| MIL-100(Fe)@MIP | 308.15 | 45566.68                     | -27.4820                             | -3.7349                              | 0.0772                                               |
|                 | 318.15 | 44607.87                     | -28.3175                             |                                      |                                                      |
|                 | 298.15 | 19724.26                     | -24.5145                             |                                      |                                                      |
| MIL-100(Fe)@NIP | 308.15 | 19450.31                     | -25.3009                             | -0.6489                              | 0.0800                                               |
|                 | 318.15 | 19404.65                     | -26.1158                             |                                      |                                                      |

134
